# Supplementary material for: Synthesis, crystal structure and properties of a new 1D polymeric nitrogen-rich energetic complex {TAG[Li(BTO)(H2O)]}n based on 1H,1′H-5,5′-bitetrazole-1,1′-diolate
Source: Royal Society of Chemistry journal article supplement (doi:10.1039/c6ra12649a), 2016-01-01
Supplement: c6ra12649a1.pdf [file c6ra12649a1.pdf]

# Synthesis, Crystal Structure and Properties of a New 1D Polymeric Nitrogen-Rich Energetic Complex $\{\text{TAG}[\text{Li}(\text{BTO})(\text{H}_2\text{O})]\}_n$ based on 1*H*,1'*H*-5,5'-bitetrazole-1,1'-diolate (BTO)

Zhi-Bin Zhang, Cai-Xia Xu, Lei Yin, Zhen Wang, Xin Yin, Jian-Guo Zhang \*

State Key Laboratory of Explosion Science and Technology, Beijing Institute of Technology, Beijing 100081, PR China

## *Supporting Information*

### Figure of contents:

- S1. The  $^1\text{H}$  spectra of the polymer.
- S2. The  $^{13}\text{C}$  spectra of the polymer.
- S3. The  $^{15}\text{N}$  spectra of the polymer.
- S4. The FT-IR spectra of the polymer.
- S5. The packing diagram from *a*-axis.
- S6. The packing diagram from *b*-axis.
- S7. The packing diagram from *c*-axis.

---

\* Corresponding author. Tel & Fax: +86 10 68918091.  
E-mail: [zjgbit@bit.edu.cn](mailto:zjgbit@bit.edu.cn)(J.-G.Zhang)

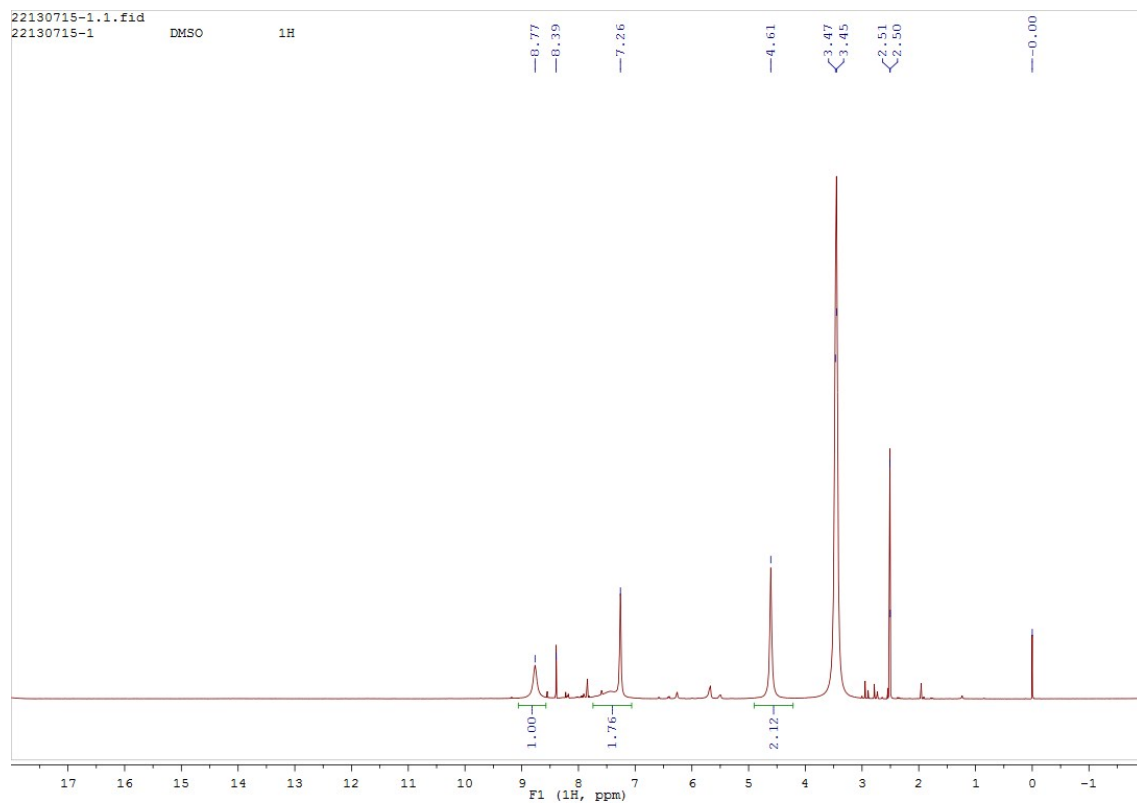

**Fig. S1** The  $^1\text{H}$  spectra of the polymer.

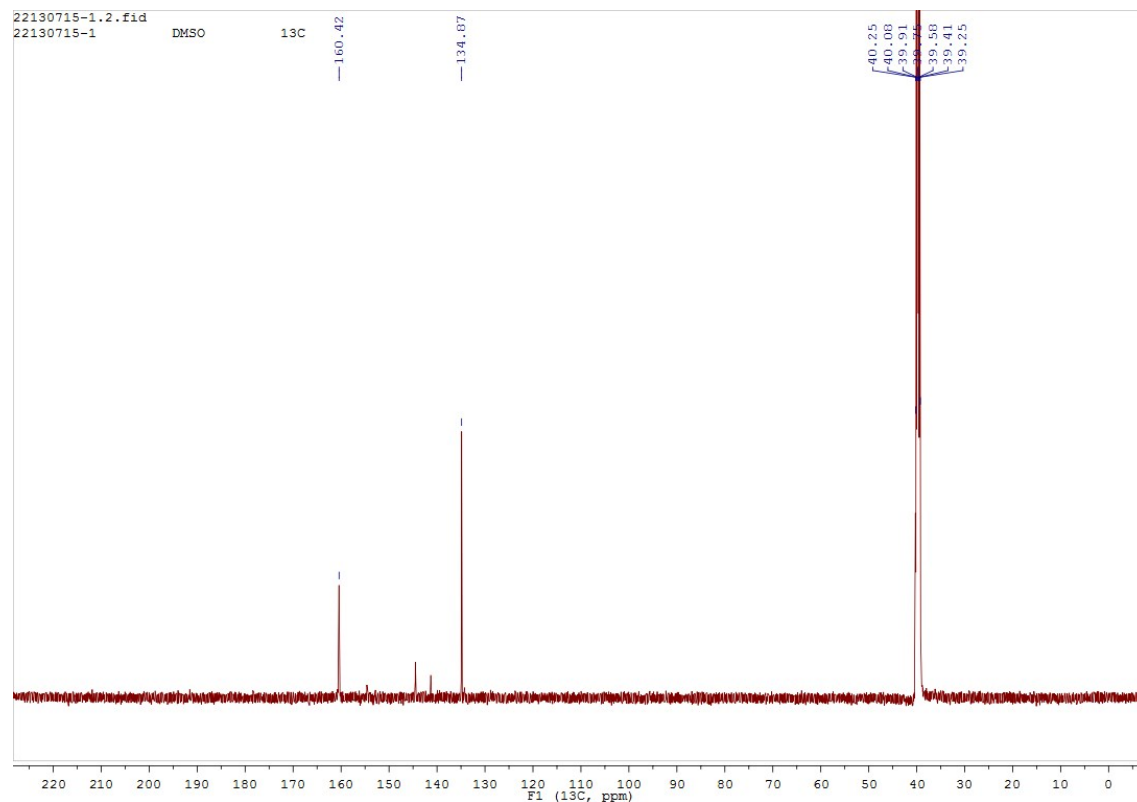

**Fig. S2** The  $^{13}\text{C}$  spectra of the polymer.

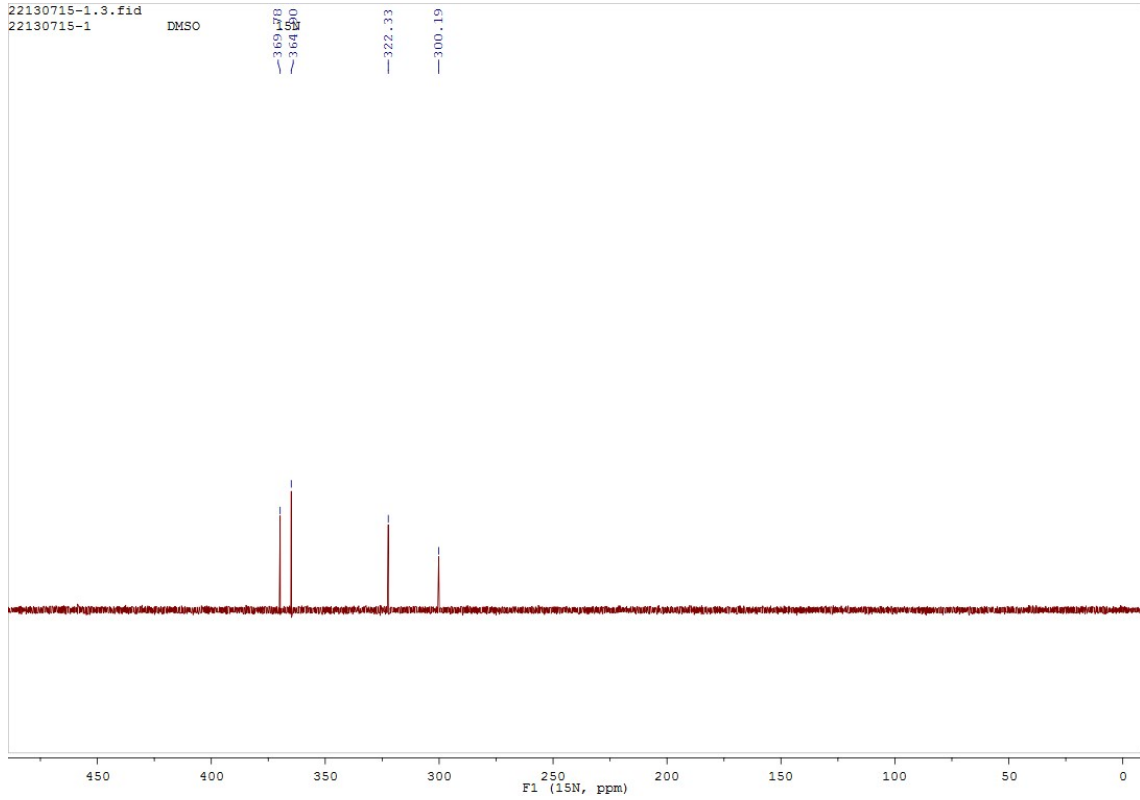

**Fig. S3** The  $^{15}\text{N}$  spectra of the polymer.

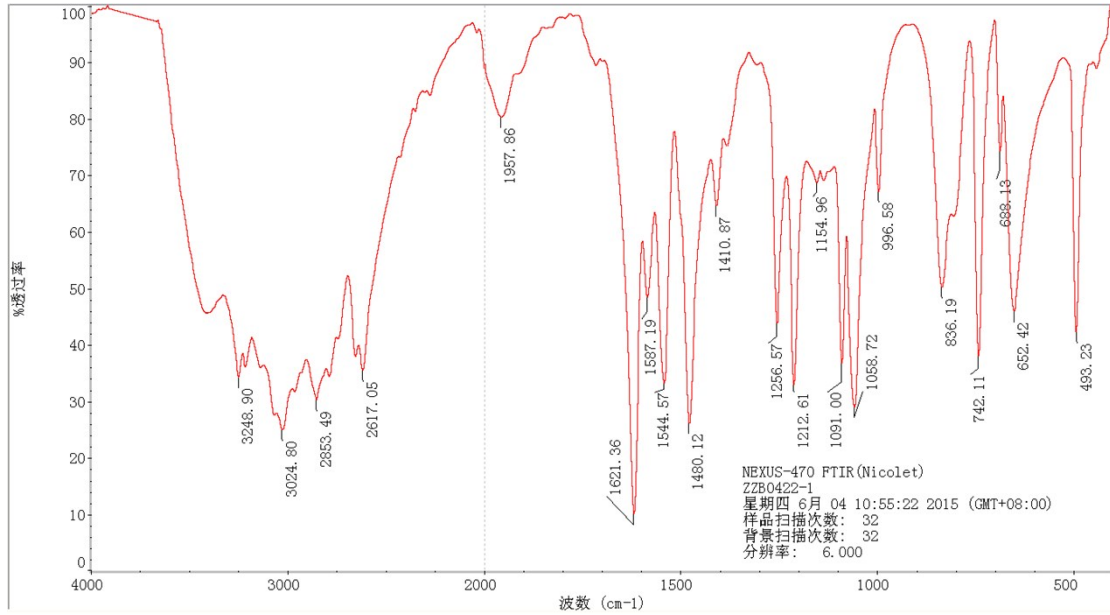

**Fig. S4** The FT-IR spectra of the polymer.

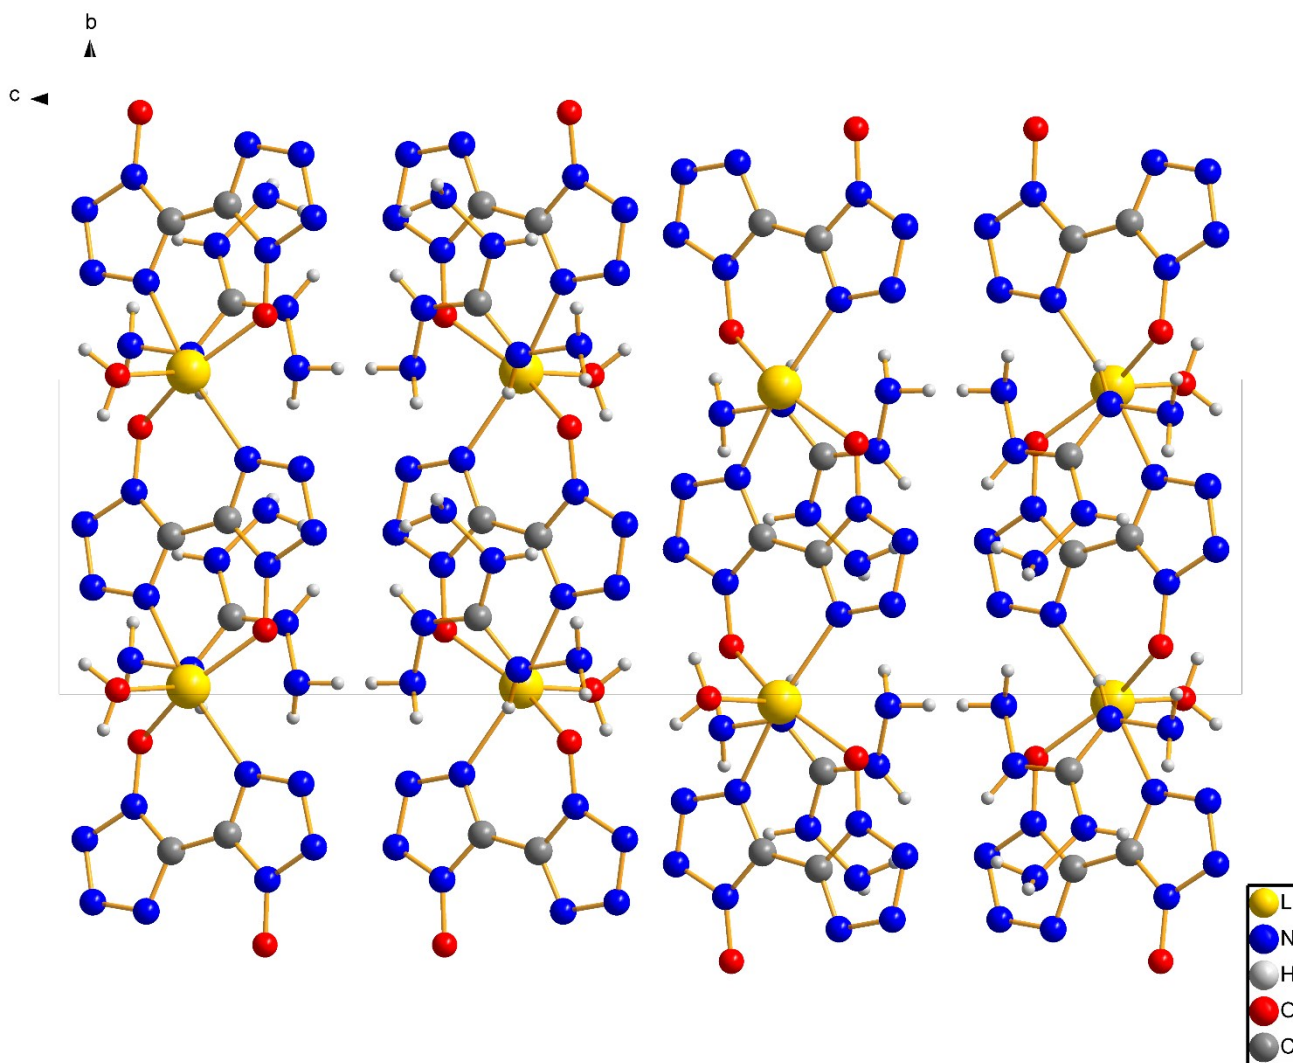

**Fig. S5** The packing diagram from *a*-axis.

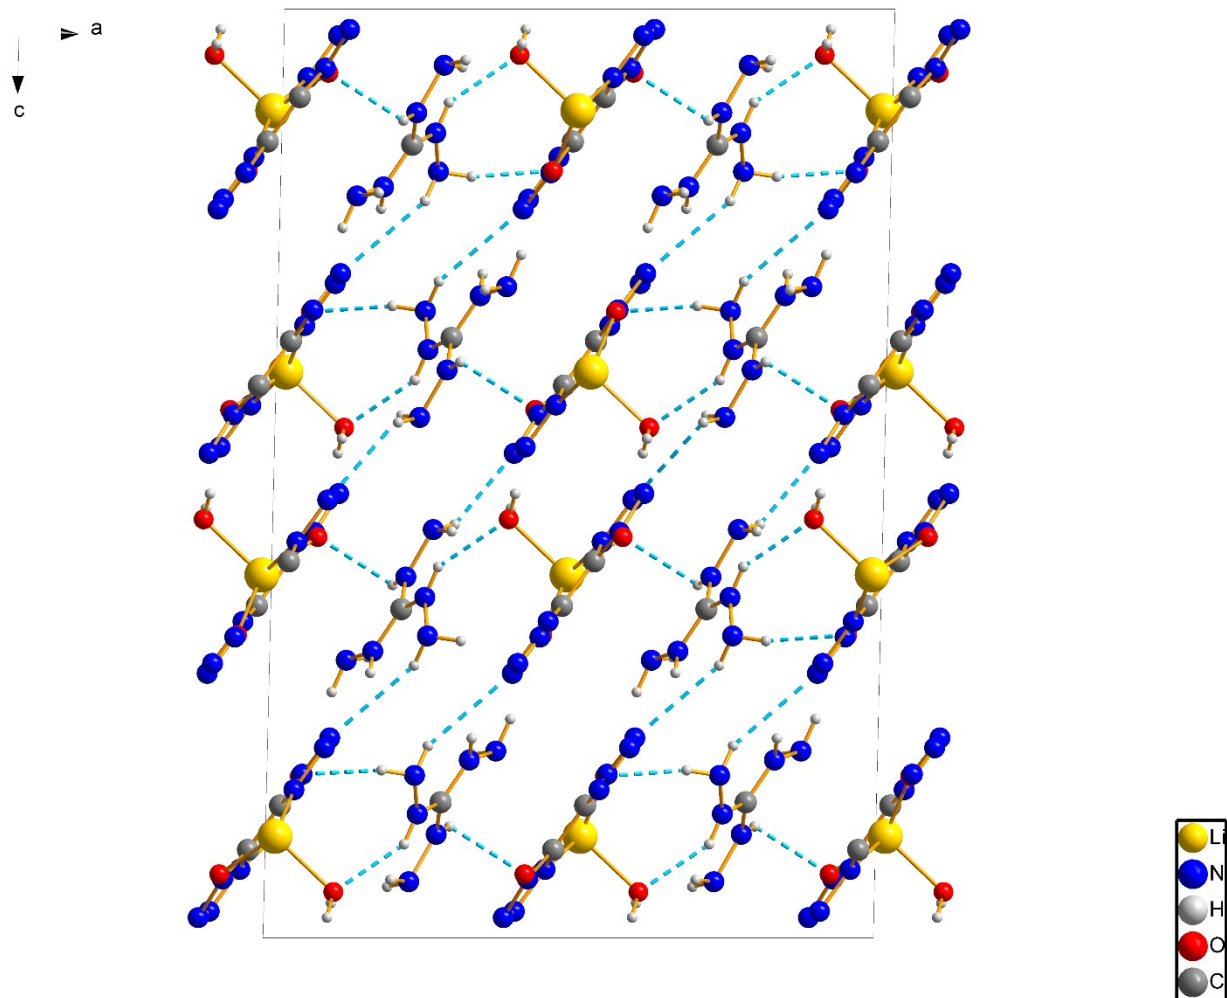

Fig. S6 The packing diagram from *b*-axis.

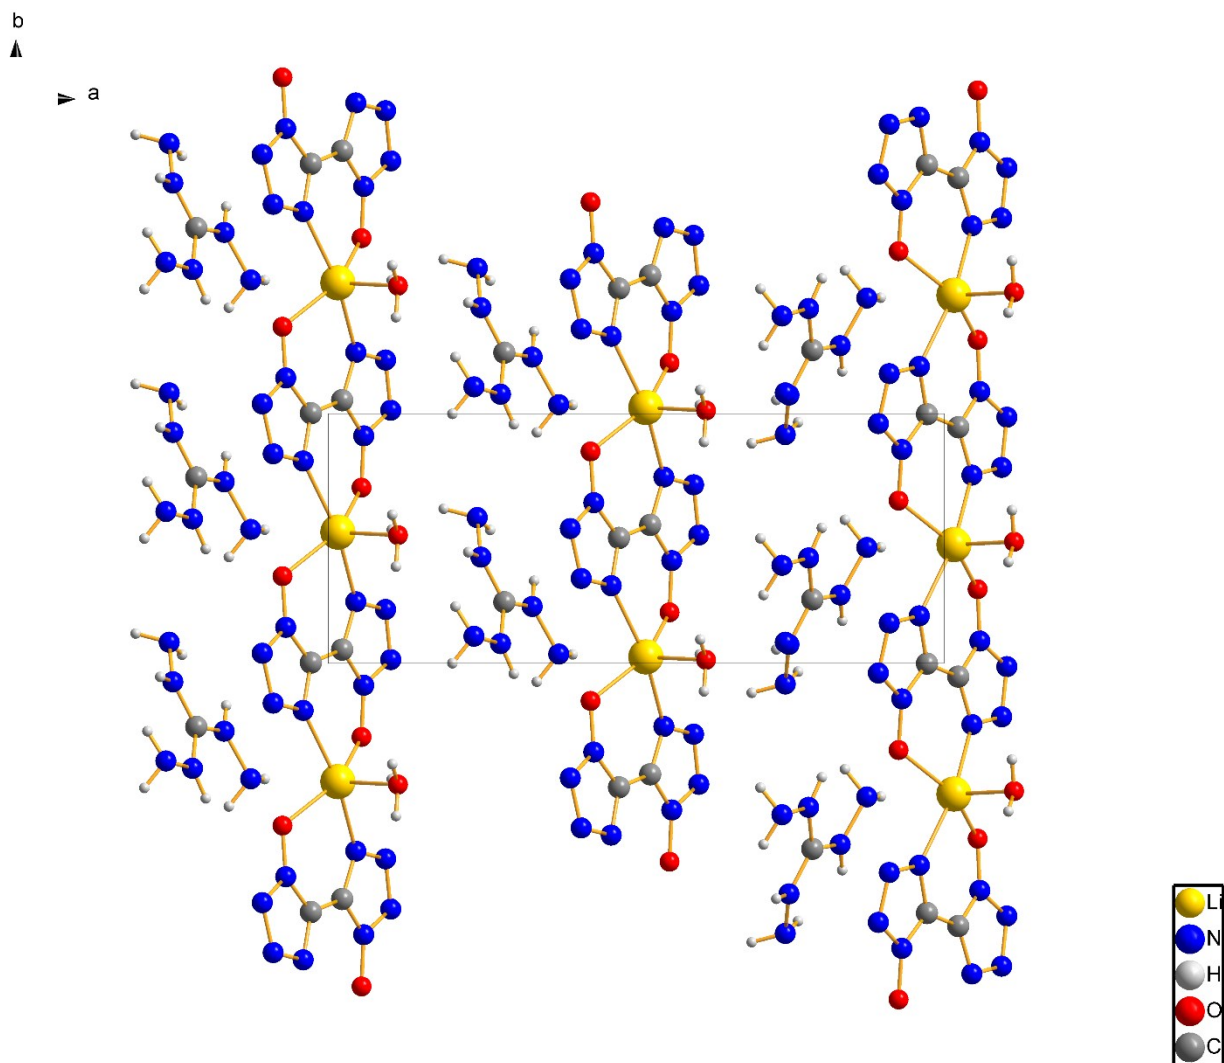

Fig. S7 The packing diagram from *c*-axis.
